# Supplementary material
Source: PubMed Central journal article supplement (PMC3559200)
Supplement: Supp_Data.pdf [file Supp_Data.pdf]

## Supplementary Data

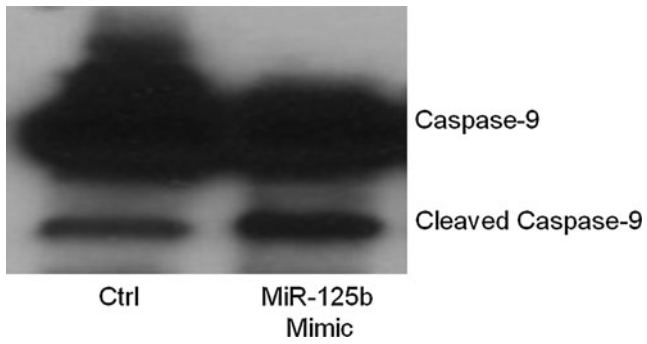

**SUPPLEMENTARY FIG. S1.** Longer exposure of the film of Western blot of caspase-9 in Figure 4B was performed to show the clearer cleaved form of caspase-9.
